# Supplementary material for: Rejuvenation of perovskite solar cells
Source: Royal Society of Chemistry journal article supplement (doi:10.1039/c6tc02307j), 2016-01-01
Supplement: c6tc02307j1.pdf [file c6tc02307j1.pdf]

## Supporting Information

### Rejuvenation of Perovskite Solar Cells

Yi-You Huang, Ganesh Gollavelli, Yi-Hsiang Chao, Chain-Shu Hsu\*

Department of Applied Chemistry, National Chiao Tung University, 1001,

Ta Hsueh Road, Hsinchu, 30010, Taiwan (ROC).

\*E-mail: [cshsu@mail.nctu.edu.tw](mailto:cshsu@mail.nctu.edu.tw)

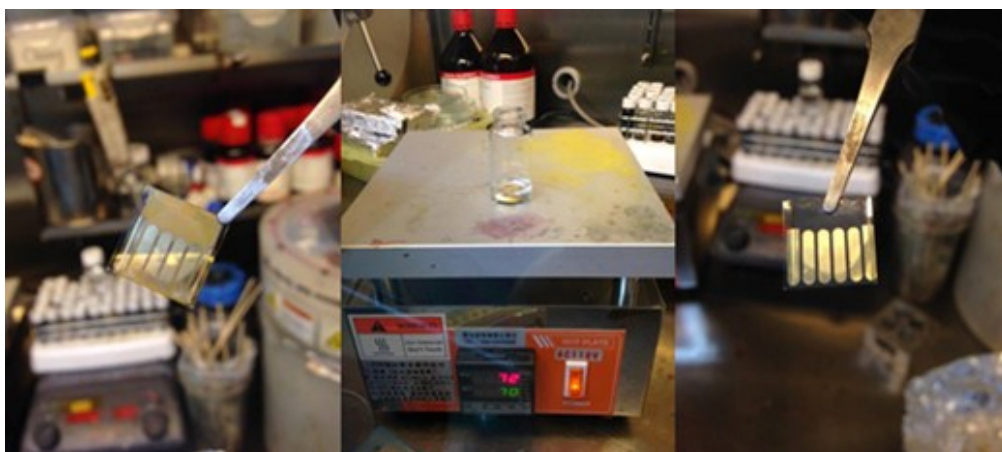

**Figure S1.** The rejuvenation method.

**Table S1:** The performance of the device ITO/ZnO - planar/Perovskite/Spiro-OMeTAD/Al, Ag, Au.

| Device | $V_{oc}$ (V) | $J_{sc}$ (mA/cm <sup>2</sup> ) | FF (%) | PCE (%) |
|--------|--------------|--------------------------------|--------|---------|
| Al     | 0.08         | 1.30                           | 24.4   | 0.03    |
| Ag     | 0.99         | 15.7                           | 59.8   | 9.28    |
| Au     | 0.98         | 18.8                           | 63.0   | 11.6    |

**Table S2:** The performance of the device ITO/ZnO - planar and ZnO, TiO<sub>2</sub> NPs /Perovskite/Spiro-OMeTAD/Au.

| Device               | $V_{oc}$ (V) | $J_{sc}$ (mA/cm <sup>2</sup> ) | FF (%) | PCE (%) |
|----------------------|--------------|--------------------------------|--------|---------|
| ZnO NPs              | 0.87         | 15.5                           | 44.0   | 6.05    |
| TiO <sub>2</sub> NPs | 0.96         | 11.9                           | 55.2   | 6.30    |
| ZnO-Planar           | 0.98         | 18.8                           | 63.0   | 11.6    |
